# Supplementary material for: Modulating the carbon tails of ligands on AuCu 14 nanoclusters enables the transition from single to dual emission
Source: Royal Society of Chemistry journal article supplement (doi:10.1039/d5nr05074j), 2025-12-26
Supplement: d5nr05074j1.pdf [file d5nr05074j1.pdf]

# Supporting Information

Lin Zhu,<sup>#a</sup> Pu Gao,<sup>#a</sup> Jing Du,<sup>#b</sup> Yan Shen,<sup>a</sup> Yan Feng,<sup>\*c</sup> Mingzai Wu,<sup>\*a</sup> Yanjun Ding,<sup>\*a</sup> Manzhou Zhu<sup>c</sup>

<sup>a</sup> School of Materials Science and Engineering, Anhui University, Hefei 230601, China.

<sup>b</sup> Testing and Analysis Center, Hebei Normal University, Shijiazhuang 050024, China.

<sup>c</sup> Department of Chemistry and Centre for Atomic Engineering of Advanced Materials, Anhui Province Key Laboratory of Chemistry for Inorganic/Organic Hybrid Functionalized Materials, Key Laboratory of Structure and Functional Regulation of Hybrid Materials, Anhui University, Ministry of Education, Anhui University, Anhui University, Hefei 230601, China.

## Experimental Procedures

**1.1. Materials.** All reagents are commercially available and used directly without further purification, including CuCl (98%), 4-methylbenzenethiolate (98%), 4-isopropylbenzenethiol (95%), 4-tert-butylbenzenethiol (98%), tetraoctylammonium bromide (TOAB, 98%), triphenylphosphine (TPP, 98%), sodium borohydride (99.99%), chloroform (HPLC grade,  $\geq 99.9\%$ ), methanol (HPLC grade,  $\geq 99.9\%$ ), *n*-hexane (HPLC grade,  $\geq 99.9\%$ ).  $\text{Me}_2\text{SAuCl}$ ,  $\text{Au}(\text{TPP})\text{Cl}$  and  $[\text{Cu}_{23}(\text{SC}_6\text{H}_4\text{-R})_{18}(\text{TPP})_6](\text{SbF}_6)$  were prepared according to literature methods.<sup>[1-3]</sup>

### 1.2. Synthesis of the $[\text{AuCu}_{14}(\text{SC}_6\text{H}_4\text{-CH}_3)_{12}(\text{TPP})_6](\text{SbF}_6)$ cluster.

The whole reaction process was carried out at room temperature. 5 mg of the  $[\text{Cu}_{23}(\text{SC}_6\text{H}_4\text{-CH}_3)_{18}(\text{TPP})_6](\text{SbF}_6)$  nanocluster was firstly dissolved in 2 mL of  $\text{CH}_2\text{Cl}_2$  under stirring. Then,  $\text{Au}(\text{TPP})\text{Cl}$  (0.5 mg) was added to the above solution. After irradiated at 365 nm for 30 seconds, the solution gradually changed from light yellow to red, accompanied by a bright red light. The organic solution was evaporated and washed several times with methanol. Finally, red crystals were obtained by liquid diffusion of *n*-hexane into a  $\text{CH}_2\text{Cl}_2$  solution of the nanocluster for three days with a  $\sim 60\%$  yield (Cu atom basis). ESI-MS ( $[\text{AuCu}_{14}(\text{SC}_6\text{H}_4\text{-CH}_3)_{12}(\text{TPP})_5]^+$ ):  $m/z = 3876.75$  (calcd. 3876.75).

### 1.3. Synthesis of the $[\text{AuCu}_{14}(\text{SC}_6\text{H}_4\text{-CH}(\text{CH}_3)_2)_{12}(\text{TPP})_6](\text{SbF}_6)$ cluster.

The whole reaction process was carried out at room temperature. 5 mg of the  $[\text{Cu}_{23}(\text{SC}_6\text{H}_4\text{-CH}(\text{CH}_3)_2)_{18}(\text{TPP})_6](\text{SbF}_6)$  nanocluster was firstly dissolved in 2 mL of  $\text{CH}_2\text{Cl}_2$  under stirring. Then,  $\text{Au}(\text{TPP})\text{Cl}$  (0.5 mg) was added to the above solution. After irradiated at 365 nm for 30 seconds, the solution gradually changed from light yellow to red, accompanied by a bright red light. The organic solution was evaporated and washed several times with methanol. Finally, red crystals were obtained by liquid diffusion of *n*-hexane into a  $\text{CH}_2\text{Cl}_2$  solution of the nanocluster for three days with a  $\sim 25\%$  yield (Cu atom basis). ESI-MS ( $[\text{AuCu}_{14}(\text{SC}_6\text{H}_4\text{-CH}(\text{CH}_3)_2)_{12}(\text{TPP})_5]^+$ ):  $m/z = 4213.15$  (calcd. 4212.75).

### 1.4. Synthesis of the $[\text{AuCu}_{14}(\text{SC}_6\text{H}_4\text{-C}(\text{CH}_3)_3)_{12}(\text{TPP})_6](\text{SbF}_6)$ cluster.

The whole reaction process was carried out at room temperature. 5 mg of the  $[\text{Cu}_{23}(\text{SC}_6\text{H}_4\text{-C}(\text{CH}_3)_3)_{18}(\text{TPP})_6](\text{SbF}_6)$  nanocluster was firstly dissolved in 2 mL of  $\text{CH}_2\text{Cl}_2$  under stirring. Then,  $\text{Au}(\text{TPP})\text{Cl}$  (0.5 mg) was added to the above solution. After irradiated at 365 nm for 30 seconds, the solution gradually changed from light yellow to red, accompanied by a bright red light. The organic solution was evaporated and washed several times with methanol. Finally, red crystals were obtained by liquid diffusion of *n*-hexane into a  $\text{CH}_2\text{Cl}_2$  solution of the nanocluster for three days with a  $\sim 38\%$  yield (Cu atom basis). ESI-MS ( $[\text{AuCu}_{14}(\text{SC}_6\text{H}_4\text{-C}(\text{CH}_3)_3)_{12}(\text{TPP})_4]^+$ ):  $m/z = 4119.19$  (calcd. 4118.46).

### 1.5. Titration experiments.

1.7 mg of  $\text{AgNO}_3$  was dissolved in 5 mL of methanol under stirring to obtain a homogeneous  $\text{AgNO}_3$  solution with a concentration of 0.34 mg/mL ( $\sim 2.0$  mM). Then, 3 mL of  $\text{AuCu}_{14}\text{-CH}(\text{CH}_3)_2$  (0.2 mg/mL) solution in  $\text{CH}_2\text{Cl}_2$  was placed in a cuvette to record its initial fluorescence spectrum. After the addition of  $\text{AgNO}_3$  solution (15  $\mu\text{L}$ ,  $\sim 10$   $\mu\text{M}$ ) to the above  $\text{CH}_2\text{Cl}_2$  solution, the cuvette was gently shaken to ensure thorough mixing and record its fluorescence spectrum. This process was repeated several times to obtain fluorescence titration spectra covering the  $\text{Ag}^+$  concentration range of 0-100  $\mu\text{M}$ . The titration experiments of other metal ions were similar to  $\text{Ag}^+$  ion.

## Characterization

**2.1. Photoluminescence spectra.** Photoluminescence spectra were measured using an FL-7000 spectrofluorometer with the same optical density (OD) of  $\sim 0.2$ . Absolute quantum yield (QY) and emission lifetime were measured on the HORIBA FluoroMax-4P.

**2.2. UV-vis absorption spectra.** UV-visible absorption spectra were recorded on M4 spectrophotometer. Crystals are dissolved in solution.

**2.3. Single Crystal X-ray Diffraction.** Single crystal X-ray diffraction data were recorded on a Rigaku XtaLAB Synergy-R Diffraction equipped with a digital camera diffractometer comprising a microfocus rotating anode X-ray source (Cu  $K\alpha$ ,  $\lambda = 1.54178$  Å) and an HPC detector [HyPix-6000C] radiation for the crystal structures. The diffraction data were processed during data collection using CrysAlis<sup>Pro</sup>. The structures were solved and refined during data collection with AutoChem. Final structure refinements were performed using SHELXL implemented in Olex2.<sup>[4-6]</sup> Data collection, structure refinement parameters and crystallographic data for the crystals are given in Table S1.

**2.4. Electrospray ionization (ESI) mass spectrum.** Electrospray ionization mass spectra (ESI-MS) were acquired on a Waters Q-TOF mass spectrometer equipped with a Z-spray source. The samples are dissolved in a mixture solution of  $\text{CH}_2\text{Cl}_2/\text{CH}_3\text{OH}$  ( $v:v = 1:1$ ), which is directly infused into the chamber at 20  $\mu\text{L}/\text{min}$  with positive mode.

**2.5. X-ray photoelectron spectroscopy (XPS).** X-ray photoelectron spectroscopy measurements were performed on Thermo ESCALAB 250 equipped with a monochromated Al  $K\alpha$  (1486.8 eV) 150 W X-ray source, 0.5 mm circular spot size, a flood

gun to counter charging effects, and the S3 analysis chamber base pressure lower than  $1 \times 10^{-9}$  mbar; data were collected with  $FAT = 20$  eV. The sample holder was aluminum plate used during the X-ray Photoelectron Spectroscopy (XPS) analysis.

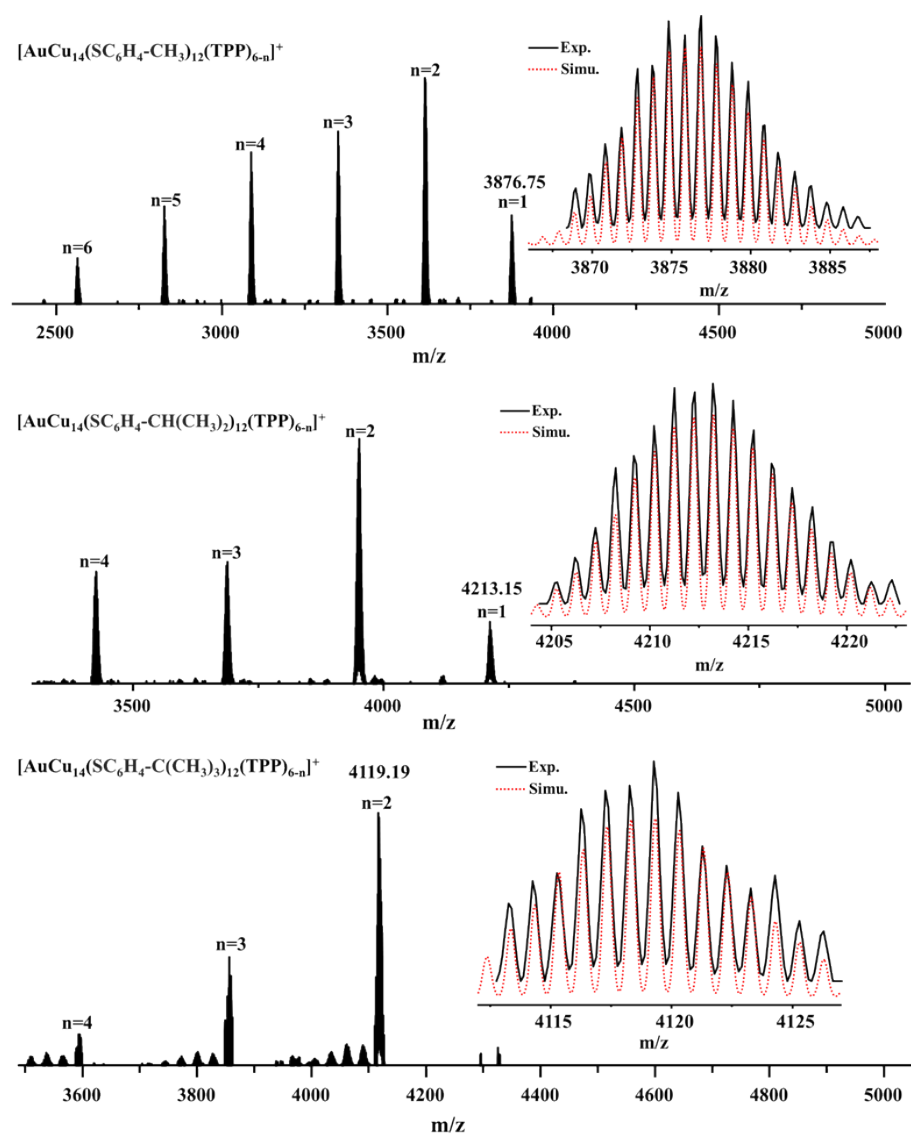

**Figure S1.** Positive-mode ESI mass spectra of  $\text{AuCu}_{14}\text{-CH}_3$ ,  $\text{AuCu}_{14}\text{-CH}(\text{CH}_3)_2$  and  $\text{AuCu}_{14}\text{-C}(\text{CH}_3)_3$ .

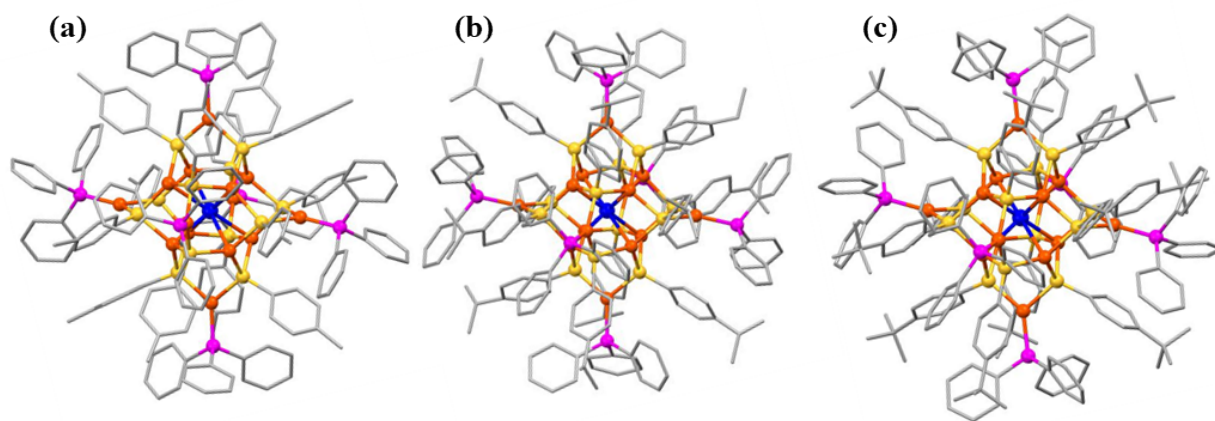

**Figure S2.** The overall structure of the  $\text{AuCu}_{14}$  cluster shown in ball-and-stick mode: (a)  $\text{AuCu}_{14}\text{-CH}_3$ , (b)  $\text{AuCu}_{14}\text{-CH(CH}_3)_2$  and (c)  $\text{AuCu}_{14}\text{-C(CH}_3)_3$ . Cu orange, Au blue, S yellow, P pink, C gray. H atoms are omitted for clarity.

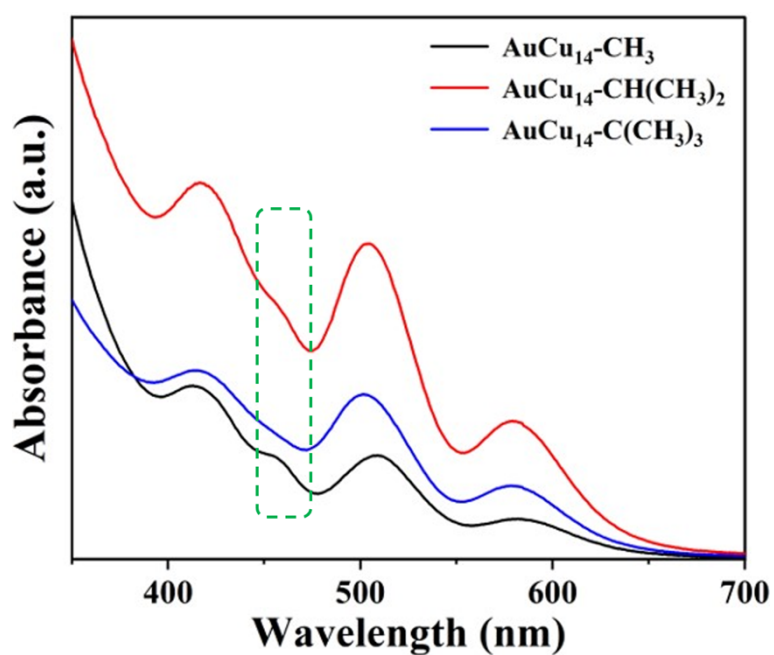

**Figure S3.** UV-vis absorption spectra of  $\text{AuCu}_{14}\text{-CH}_3$ ,  $\text{AuCu}_{14}\text{-CH(CH}_3)_2$  and  $\text{AuCu}_{14}\text{-C(CH}_3)_3$  in  $\text{CH}_2\text{Cl}_2$  solution at room temperature.

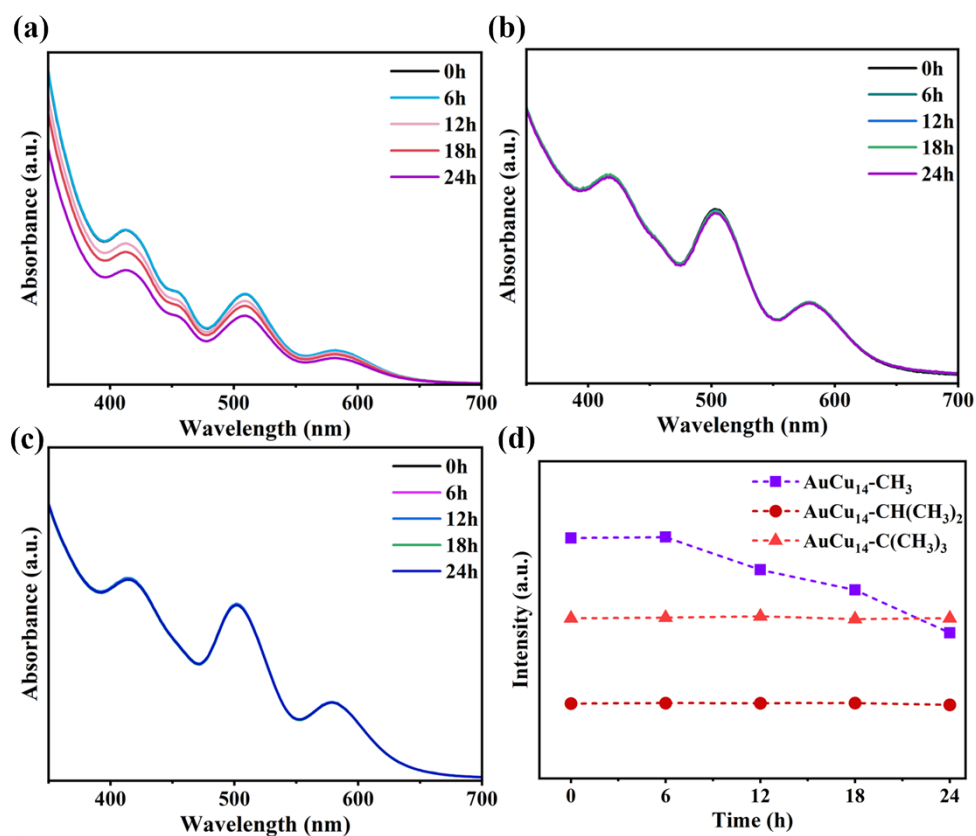

**Figure S4.** The time-dependent UV-vis absorption spectra of (a)  $\text{AuCu}_{14}\text{-CH}_3$ , (b)  $\text{AuCu}_{14}\text{-CH(CH}_3)_2$  and (c)  $\text{AuCu}_{14}\text{-C(CH}_3)_3$  in  $\text{CH}_2\text{Cl}_2$  solution at room temperature. (d) The change of absorption intensity located at 415 nm along with time.

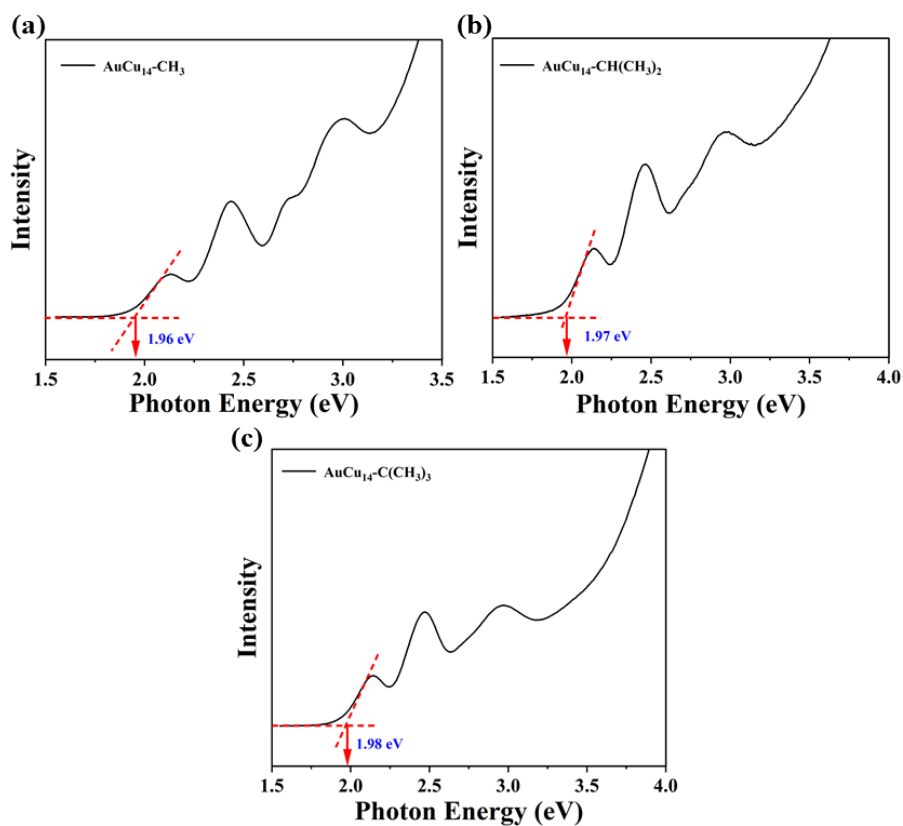

**Figure S5.** Optical gap determination of  $\text{AuCu}_{14}\text{-CH}_3$ ,  $\text{AuCu}_{14}\text{-C(CH}_3)_2$  and  $\text{AuCu}_{14}\text{-C(CH}_3)_3$  in  $\text{CH}_2\text{Cl}_2$  solution.

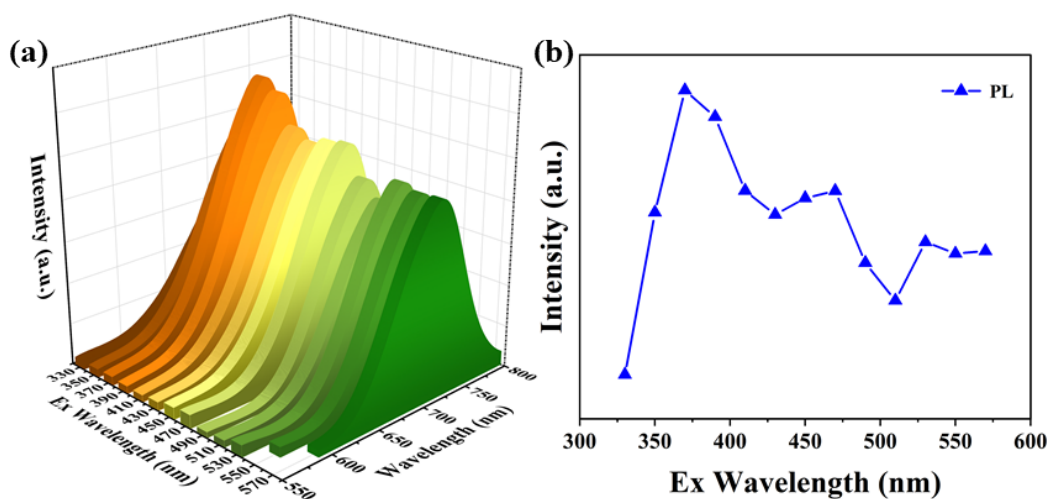

**Figure S6.** The change trends of PL centered at 720 nm of  $\text{AuCu}_{14}\text{-C}(\text{CH}_3)_3$  under different excitations in  $\text{CH}_2\text{Cl}_2$ .

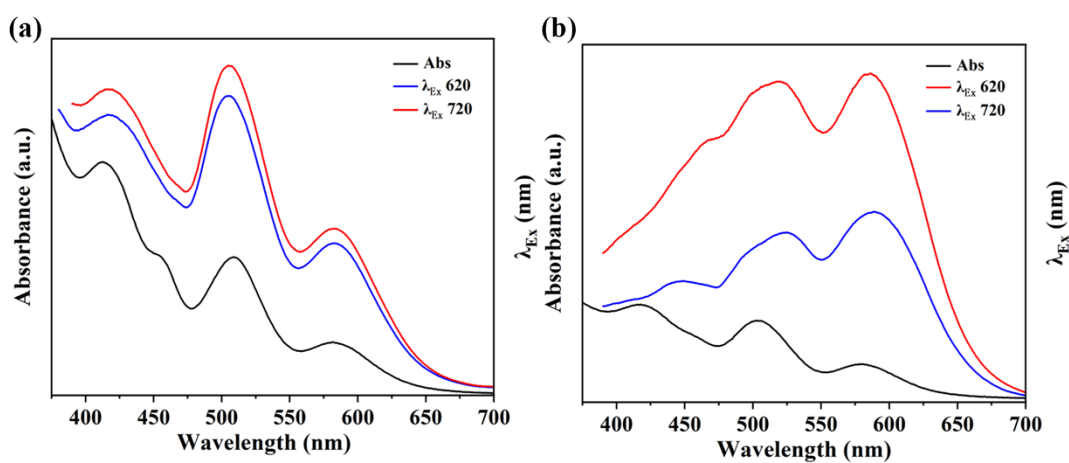

**Figure S7.** The PL excitation spectra and UV-vis absorption spectra of (a)  $\text{AuCu}_{14}\text{-CH}_3$  and (b)  $\text{AuCu}_{14}\text{-CH}(\text{CH}_3)_2$  in  $\text{CH}_2\text{Cl}_2$  solution at room temperature.

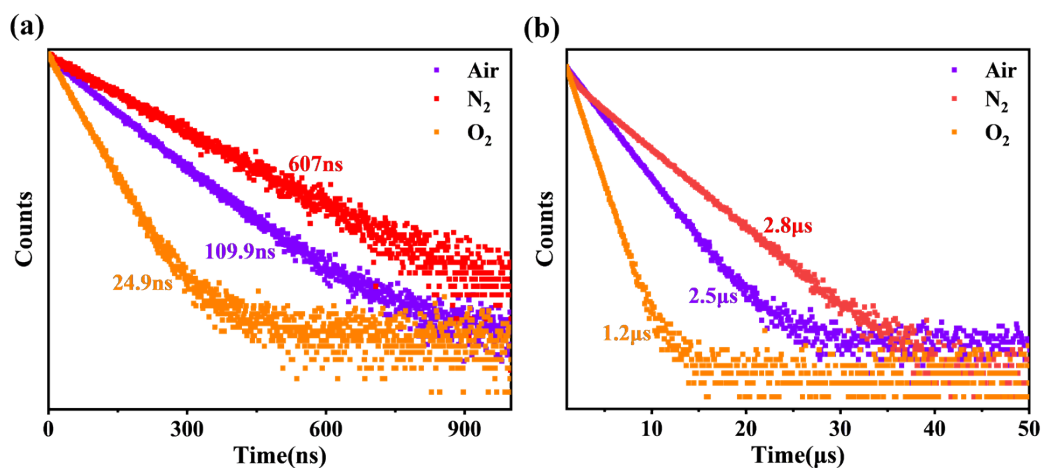

**Figure S8.** (a) The PL I and (b) PL II emission lifetime of  $\text{AuCu}_{14}\text{-CH}_3$  in  $\text{CH}_2\text{Cl}_2$  solution under air,  $\text{O}_2$  and  $\text{N}_2$  atmospheres, respectively.

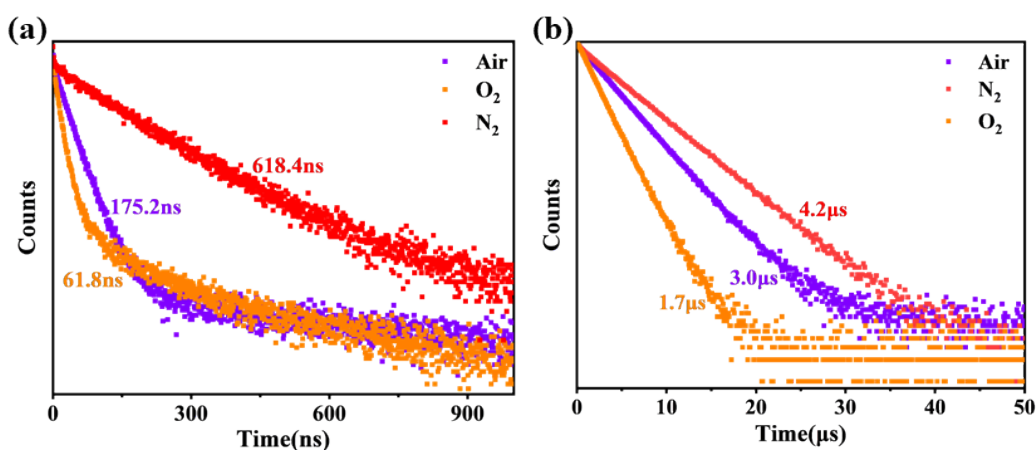

**Figure S9.** (a) The PL I and (b) PL II emission lifetime of  $\text{AuCu}_{14}\text{-CH}(\text{CH}_3)_2$  in  $\text{CH}_2\text{Cl}_2$  solution under air,  $\text{O}_2$  and  $\text{N}_2$  atmospheres, respectively.

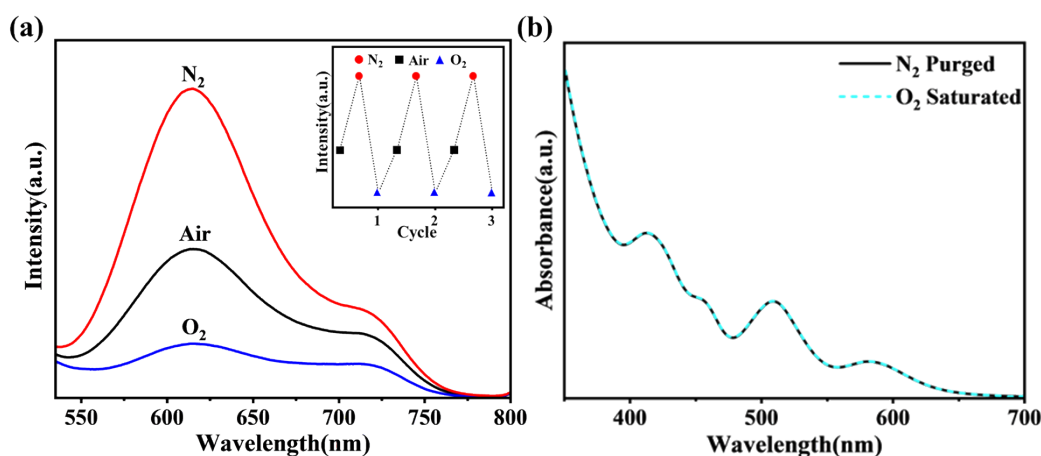

**Figure S10.** (a) Emission spectra of  $\text{AuCu}_{14}\text{-CH}_3$  in  $\text{CH}_2\text{Cl}_2$  solution under air,  $\text{O}_2$  and  $\text{N}_2$  atmospheres (inset: the intensity at 620 nm with 3 cycles under different atmospheres). (b) UV-vis spectra of  $\text{AuCu}_{14}\text{-CH}_3$  in  $\text{CH}_2\text{Cl}_2$  solution protected by  $\text{N}_2$  and  $\text{O}_2$ .

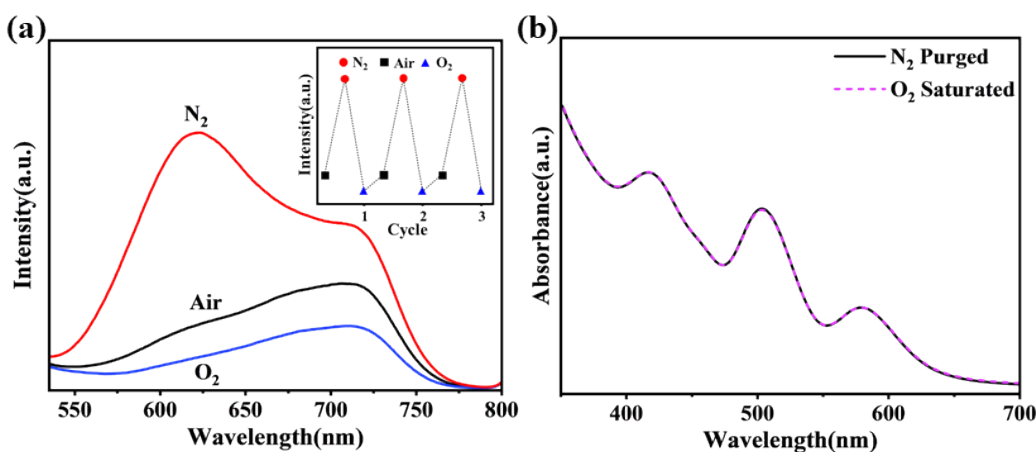

**Figure S11.** (a) Emission spectra of  $\text{AuCu}_{14}\text{-CH}(\text{CH}_3)_2$  in  $\text{CH}_2\text{Cl}_2$  solution under air,  $\text{O}_2$  and  $\text{N}_2$  atmospheres (inset: the intensity at 620 nm with 3 cycles under different atmospheres). (b) UV-vis spectra of  $\text{AuCu}_{14}\text{-CH}(\text{CH}_3)_2$  in  $\text{CH}_2\text{Cl}_2$  solution protected by  $\text{N}_2$  and  $\text{O}_2$ .

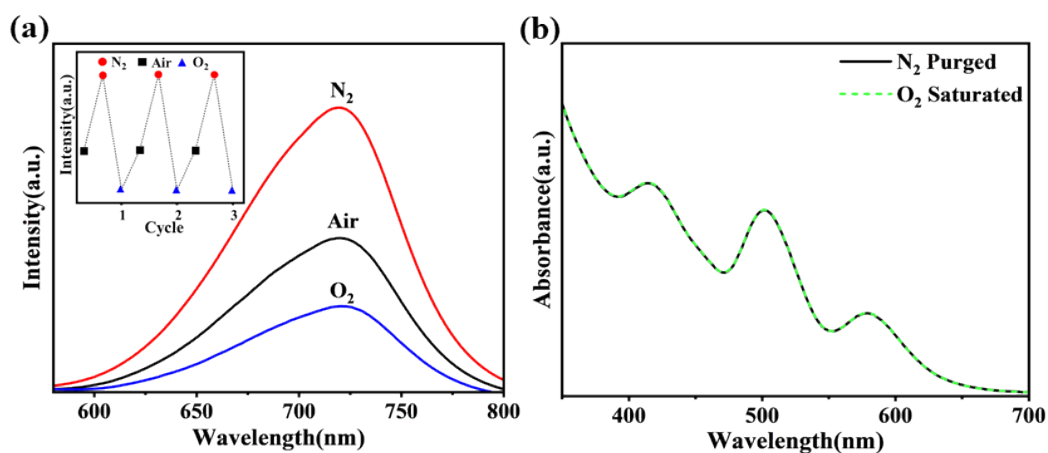

**Figure S12.** (a) Emission spectra of  $\text{AuCu}_{14}\text{-C}(\text{CH}_3)_3$  in  $\text{CH}_2\text{Cl}_2$  solution under air,  $\text{O}_2$  and  $\text{N}_2$  atmospheres (inset: the intensity at 720 nm with 3 cycles under different atmospheres); (b) UV-vis spectra of  $\text{AuCu}_{14}\text{-C}(\text{CH}_3)_3$  in  $\text{CH}_2\text{Cl}_2$  solution protected by  $\text{N}_2$  and  $\text{O}_2$ .

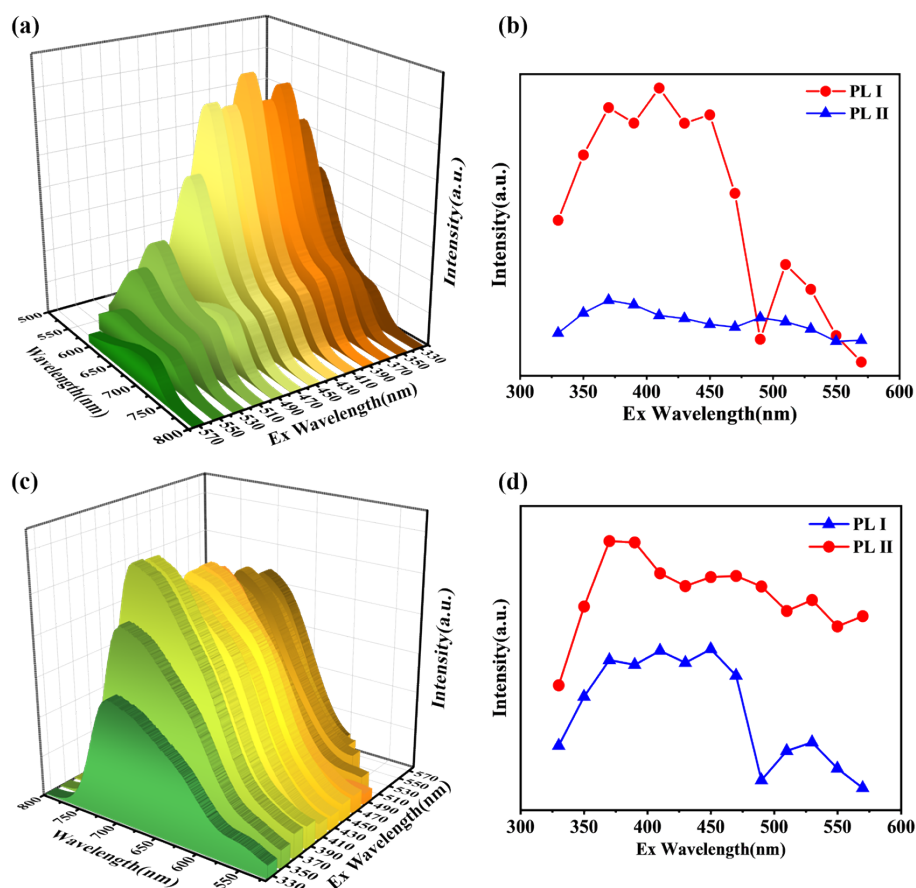

**Figure S13.** (a-b) The change trends of PL I and PL II of  $\text{AuCu}_{14}\text{-CH}_3$  under different excitations in  $\text{CH}_2\text{Cl}_2$ . (c-d) The change trends of PL I and PL II of  $\text{AuCu}_{14}\text{-CH}(\text{CH}_3)_2$  under different excitations in  $\text{CH}_2\text{Cl}_2$ .

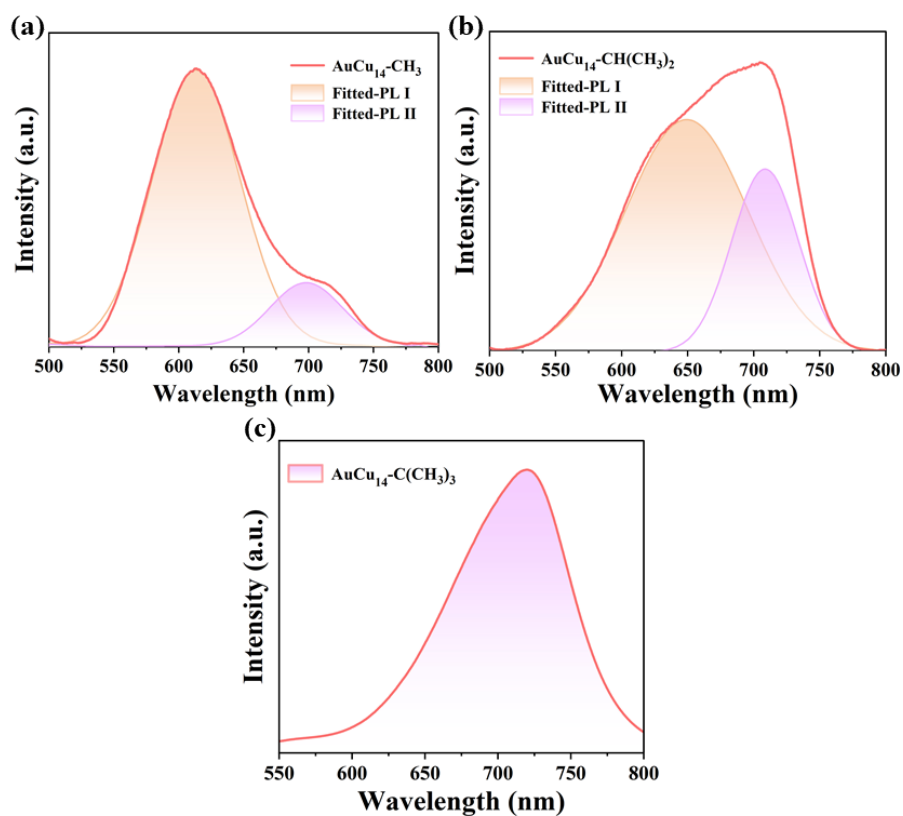

**Figure S14.** PL spectra of **AuCu<sub>14</sub>-CH<sub>3</sub>**, **AuCu<sub>14</sub>-CH(CH<sub>3</sub>)<sub>2</sub>** and **AuCu<sub>14</sub>-C(CH<sub>3</sub>)<sub>3</sub>** in DCM. Orange and purple areas represent the fitted PL I and PL II, respectively.

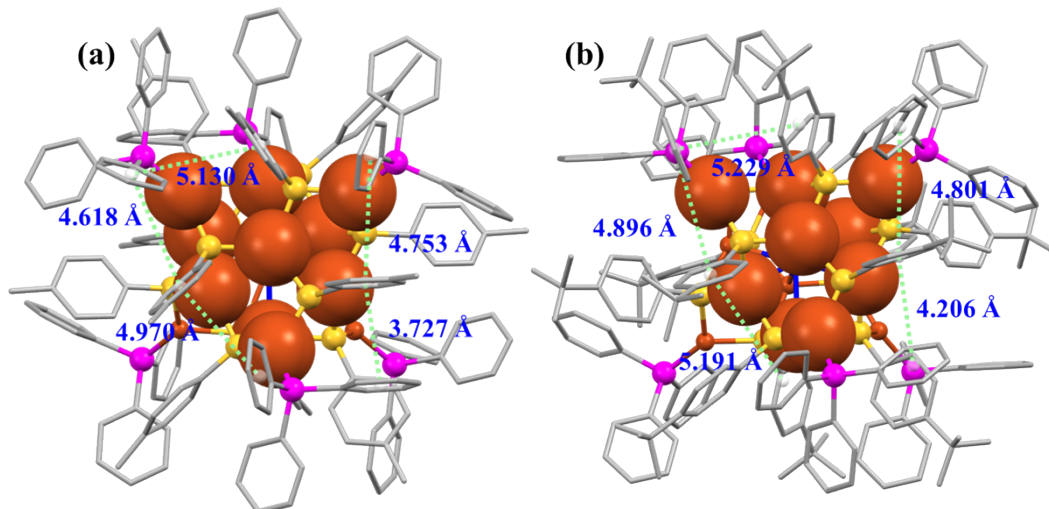

**Figure S15.** Overlay of (a) **AuCu<sub>14</sub>-CH<sub>3</sub>** and (b) **AuCu<sub>14</sub>-C(CH<sub>3</sub>)<sub>3</sub>** SCXRD structures capturing the orientation differences of carbon tails.

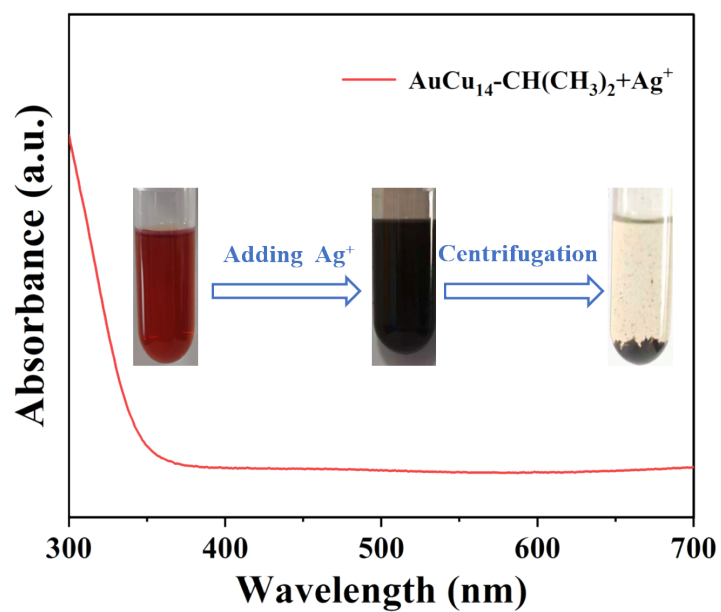

**Figure S16.** UV-vis absorption spectra of the supernatant after the addition of  $\text{Ag}^+$  ion into  $\text{AuCu}_{14}\text{-CH}(\text{CH}_3)_2$  solution (inset: photographs of the reaction system).

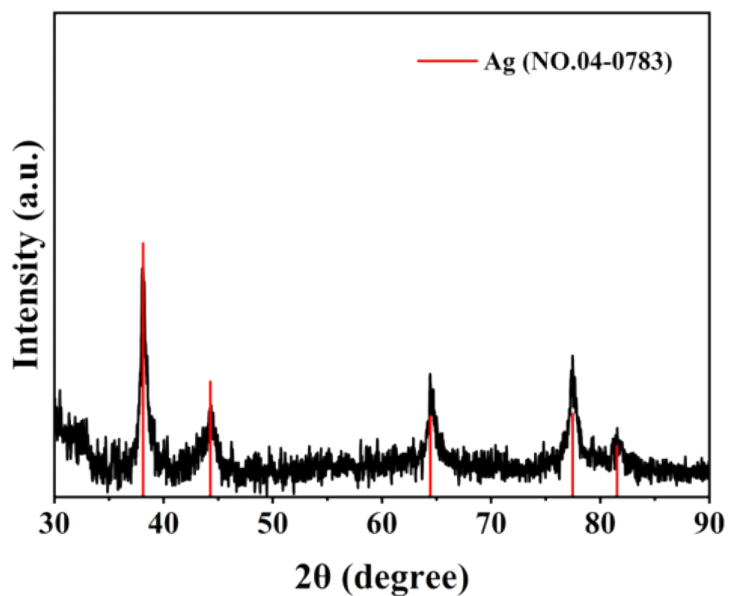

**Figure S17.** XRD spectrum of the precipitation after the addition of  $\text{Ag}^+$  ion into  $\text{AuCu}_{14}\text{-CH}(\text{CH}_3)_2$  solution.

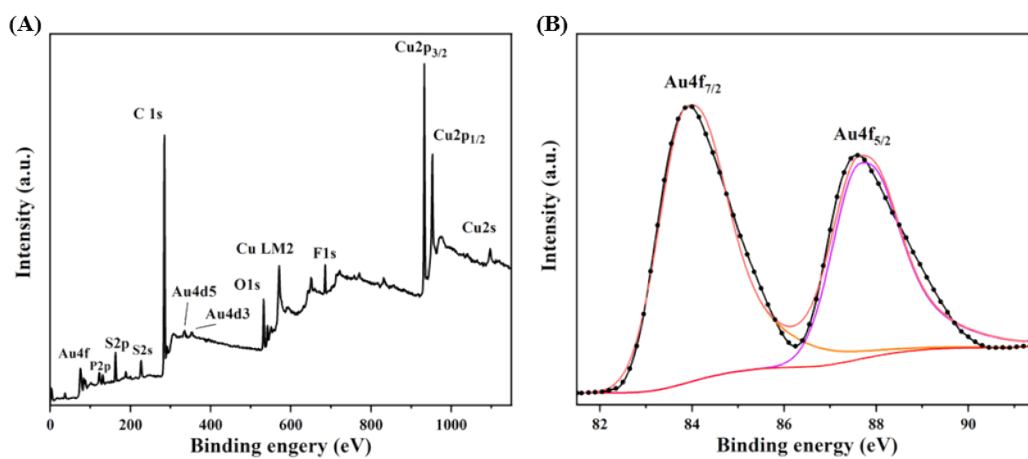

**Figure S18.** (A) The X-ray photoelectron spectroscopy (XPS) spectrum of crystalline **AuCu<sub>14</sub>**; (B) the high-resolution of Au 4f part.

**Table S1.** Experimental single crystal X-ray data.

| Identification code                       | <b>AuCu<sub>14</sub>-CH<sub>3</sub></b>                                                                                                             | <b>AuCu<sub>14</sub>-CH(CH<sub>3</sub>)<sub>2</sub></b>                             | <b>AuCu<sub>14</sub>-C(CH<sub>3</sub>)<sub>3</sub></b>                                                |
|-------------------------------------------|-----------------------------------------------------------------------------------------------------------------------------------------------------|-------------------------------------------------------------------------------------|-------------------------------------------------------------------------------------------------------|
| Empirical formula                         | C <sub>192</sub> H <sub>174</sub> Au <sub>0.6</sub> Cu <sub>14</sub> F <sub>5.4</sub> P <sub>6</sub> S <sub>12</sub> Sb <sub>0.9</sub> <sup>a</sup> | C <sub>216</sub> H <sub>216</sub> AuCu <sub>14</sub> P <sub>6</sub> S <sub>12</sub> | C <sub>228</sub> H <sub>246</sub> AuCu <sub>14</sub> F <sub>6</sub> P <sub>6</sub> S <sub>12</sub> Sb |
| Formula weight                            | 4271.76                                                                                                                                             | 4251.23                                                                             | 4879.05                                                                                               |
| Temperature /K                            | 120                                                                                                                                                 | 120.15                                                                              | 120                                                                                                   |
| Crystal system                            | Triclinic                                                                                                                                           | monoclinic                                                                          | Triclinic                                                                                             |
| Space group                               | P-1                                                                                                                                                 | P2 <sub>1</sub> /n                                                                  | P-1                                                                                                   |
| a /Å                                      | 16.5353(2)                                                                                                                                          | 19.4553(2)                                                                          | 18.9192(3)                                                                                            |
| b /Å                                      | 16.7733(2)                                                                                                                                          | 27.6070(2)                                                                          | 20.0872(3)                                                                                            |
| c /Å                                      | 19.1444(3)                                                                                                                                          | 21.0119(3)                                                                          | 21.2779(2)                                                                                            |
| α /°                                      | 110.9310(10)                                                                                                                                        | 90                                                                                  | 65.5700(10)                                                                                           |
| β /°                                      | 109.6290(10)                                                                                                                                        | 95.8050(10)                                                                         | 76.1360(10)                                                                                           |
| γ /°                                      | 98.0240(10)                                                                                                                                         | 90                                                                                  | 62.742(2)                                                                                             |
| Volume /Å <sup>3</sup>                    | 4463.14(11)                                                                                                                                         | 11227.7(3)                                                                          | 6532.17(19)                                                                                           |
| Z                                         | 1                                                                                                                                                   | 2                                                                                   | 1                                                                                                     |
| ρ <sub>calc</sub> g/cm <sup>3</sup>       | 1.589                                                                                                                                               | 1.257                                                                               | 1.240                                                                                                 |
| μ /mm <sup>-1</sup>                       | 5.981                                                                                                                                               | 4.379                                                                               | 4.632                                                                                                 |
| F(000)                                    | 2156.0                                                                                                                                              | 4126.0                                                                              | 2486.0                                                                                                |
| Radiation                                 | CuKα (λ = 1.54186 Å)                                                                                                                                | CuKα (λ = 1.54184 Å)                                                                | CuKα (λ = 1.54184 Å)                                                                                  |
| 2 θ range for data collection/°           | 5.438 to 132                                                                                                                                        | 5.576 to 129.996                                                                    | 5.264 to 140                                                                                          |
| Index ranges                              | -19 ≤ h ≤ 15, -19 ≤ k ≤ 19, -22 ≤ l ≤ 22                                                                                                            | -22 ≤ h ≤ 17, -32 ≤ k ≤ 28, -24 ≤ l ≤ 23                                            | -22 ≤ h ≤ 23, -24 ≤ k ≤ 24, -25 ≤ l ≤ 25                                                              |
| Reflections collected                     | 55053                                                                                                                                               | 70984                                                                               | 93303                                                                                                 |
| Independent reflections                   | 15529 [R <sub>int</sub> = 0.0662, R <sub>sigma</sub> = 0.0475]                                                                                      | 18938 [R <sub>int</sub> = 0.0631, R <sub>sigma</sub> = 0.0468]                      | 24657 [R <sub>int</sub> = 0.0748, R <sub>sigma</sub> = 0.0505]                                        |
| Data/restraints/parameters                | 15529/30/874                                                                                                                                        | 18938/4655/1099                                                                     | 24657/124/1298                                                                                        |
| Goodness-of-fit on F <sup>2</sup>         | 1.077                                                                                                                                               | 1.025                                                                               | 1.008                                                                                                 |
| Final R indexes [I ≥ 2σ (I)] <sup>b</sup> | R <sub>1</sub> = 0.0748, wR <sub>2</sub> = 0.1997                                                                                                   | R <sub>1</sub> = 0.0952, wR <sub>2</sub> = 0.2644                                   | R <sub>1</sub> = 0.0544, wR <sub>2</sub> = 0.1484                                                     |
| Final R indexes [all data] <sup>b</sup>   | R <sub>1</sub> = 0.0786, wR <sub>2</sub> = 0.2015                                                                                                   | R <sub>1</sub> = 0.0992, wR <sub>2</sub> = 0.2690                                   | R <sub>1</sub> = 0.0573, wR <sub>2</sub> = 0.1507                                                     |
| CCDC                                      | 2366812                                                                                                                                             | 2496270                                                                             | 1940446                                                                                               |

<sup>a</sup> Formula is given based on single-crystal X-ray data.

<sup>b</sup>  $R_1 = \Sigma ||F_o| - |F_c|| / \Sigma |F_o|$ ,  $wR_2 = \{ \Sigma [w(F_o^2 - F_c^2)^2] / \Sigma [w(F_o^2)^2] \}^{1/2}$

**Table S2.** Average bond length (Å) in **AuCu<sub>14</sub>-C(CH<sub>3</sub>)<sub>3</sub>**, **AuCu<sub>14</sub>-CH(CH<sub>3</sub>)<sub>2</sub>** and **AuCu<sub>14</sub>-CH<sub>3</sub>**.

|                                                         | Au-Cu | Cu-Cu | Cu-S  |
|---------------------------------------------------------|-------|-------|-------|
| <b>AuCu<sub>14</sub>-C(CH<sub>3</sub>)<sub>3</sub></b>  | 2.669 | 3.084 | 2.270 |
| <b>AuCu<sub>14</sub>-CH(CH<sub>3</sub>)<sub>2</sub></b> | 2.679 | 3.096 | 2.272 |
| <b>AuCu<sub>14</sub>-CH<sub>3</sub></b>                 | 2.706 | 3.127 | 2.278 |

**Table S3.** The primary bond length of **AuCu<sub>14</sub>-CH<sub>3</sub>**.

| Bond     | Length(Å) | Bond     | Length(Å) |
|----------|-----------|----------|-----------|
| Au1-Cu2  | 2.778     | Au1-Cu4  | 2.791     |
| Au1-Cu5  | 2.594     | Au1-Cu6  | 2.661     |
| Au1-Cu8  | 2.778     | Au1-Cu10 | 2.791     |
| Au1-Cu12 | 2.594     | Au1-Cu14 | 2.661     |
| Cu2-Cu4  | 3.229     | Cu2-Cu5  | 3.008     |
| Cu2-Cu6  | 3.132     | Cu4-Cu12 | 3.085     |

|          |       |          |       |
|----------|-------|----------|-------|
| Cu4-Cu13 | 3.295 | Cu5-Cu11 | 3.085 |
| Cu5-Cu13 | 3.017 | Cu6-Cu11 | 3.295 |
| Cu6-Cu12 | 3.017 | Cu9-Cu11 | 3.229 |
| Cu9-Cu12 | 3.008 | Cu9-Cu13 | 3.132 |
| Cu2-S1   | 2.293 | Cu2-S5   | 2.274 |
| Cu2-S6   | 2.279 | Cu4-S2   | 2.284 |
| Cu4-S4   | 2.273 | Cu4-S6   | 2.293 |
| Cu5-S2   | 2.307 | Cu5-S3   | 2.287 |
| Cu5-S5   | 2.295 | Cu6-S1   | 2.264 |
| Cu6-S3   | 2.290 | Cu6-S4   | 2.306 |
| Cu9-S7   | 2.293 | Cu9-S11  | 2.274 |
| Cu9-S12  | 2.279 | Cu11-S8  | 2.284 |
| Cu11-S10 | 2.273 | Cu11-S12 | 2.293 |
| Cu12-S8  | 2.307 | Cu12-S9  | 2.287 |
| Cu12-S11 | 2.295 | Cu13-S7  | 2.264 |
| Cu13-S9  | 2.290 | Cu13-S10 | 2.306 |
| S3-Cu1   | 2.257 | S6-Cu1   | 2.286 |
| S4-Cu3   | 2.250 | S5-Cu3   | 2.263 |
| S1-Cu7   | 2.266 | S2-Cu7   | 2.250 |
| S9-Cu8   | 2.257 | S12-Cu8  | 2.286 |
| S10-Cu10 | 2.250 | S11-Cu10 | 2.263 |
| S7-Cu14  | 2.266 | S8-Cu14  | 2.250 |

**Table S4.** The primary bond length of  $\text{AuCu}_{14}\text{-CH}(\text{CH}_3)_2$ .

| Bond      | Length(Å) | Bond      | Length(Å) |
|-----------|-----------|-----------|-----------|
| Au1-Cu1   | 2.729     | Au1-Cu3   | 2.721     |
| Au1-Cu5   | 2.706     | Au1-Cu7   | 2.561     |
| Au1-Cu8   | 2.729     | Au1-Cu10  | 2.721     |
| Au1-Cu12  | 2.706     | Au1-Cu14  | 2.561     |
| Cu1-Cu7   | 3.012     | Cu3-Cu7   | 2.974     |
| Cu5-Cu7   | 2.949     | Cu5-Cu10  | 3.217     |
| Cu5-Cu8   | 3.217     | Cu3-Cu12  | 3.203     |
| Cu3-Cu8   | 3.225     | Cu1-Cu12  | 3.225     |
| Cu1-Cu10  | 3.203     | Cu12-Cu14 | 2.949     |
| Cu10-Cu14 | 2.973     | Cu8-Cu14  | 3.013     |
| Cu1-S2    | 2.289     | Cu1-S4    | 2.289     |
| Cu1-S5    | 2.266     | Cu3-S1    | 2.292     |
| Cu3-S3    | 2.275     | Cu3-S4    | 2.292     |
| Cu5-S1    | 2.295     | Cu5-S2    | 2.285     |
| Cu5-S6    | 2.270     | Cu7-S3    | 2.276     |
| Cu7-S5    | 2.279     | Cu7-S6    | 2.286     |
| Cu8-S8    | 2.289     | Cu8-S10   | 2.289     |

|          |       |          |       |
|----------|-------|----------|-------|
| Cu8-S11  | 2.266 | Cu10-S7  | 2.292 |
| Cu10-S9  | 2.275 | Cu10-S10 | 2.292 |
| Cu12-S7  | 2.295 | Cu12-S8  | 2.285 |
| Cu12-S12 | 2.270 | Cu14-S9  | 2.276 |
| Cu14-S11 | 2.279 | Cu14-S12 | 2.286 |
| S1-Cu2   | 2.256 | S5-Cu2   | 2.238 |
| S2-Cu4   | 2.261 | S3-Cu4   | 2.255 |
| S4-Cu6   | 2.263 | S6-Cu6   | 2.246 |
| S7-Cu9   | 2.256 | S11-Cu9  | 2.238 |
| S8-Cu11  | 2.261 | S9-Cu11  | 2.255 |
| S10-Cu13 | 2.263 | S12-Cu13 | 2.246 |

**Table S5.** The primary bond length of  $\text{AuCu}_{14}\text{-C}(\text{CH}_3)_3$ .

| Bond     | Length(Å) | Bond     | Length(Å) |
|----------|-----------|----------|-----------|
| Au1-Cu2  | 2.555     | Au1-Cu3  | 2.743     |
| Au1-Cu5  | 2.707     | Au1-Cu7  | 2.670     |
| Au1-Cu9  | 2.555     | Au1-Cu10 | 2.743     |
| Au1-Cu12 | 2.707     | Au1-Cu14 | 2.670     |
| Cu2-Cu3  | 3.005     | Cu2-Cu5  | 2.914     |
| Cu2-Cu7  | 3.033     | Cu3-Cu12 | 3.337     |
| Cu3-Cu14 | 3.122     | Cu5-Cu10 | 3.337     |
| Cu5-Cu14 | 3.092     | Cu7-Cu10 | 3.122     |
| Cu7-Cu12 | 3.092     | Cu9-Cu10 | 3.005     |
| Cu9-Cu12 | 2.914     | Cu9-Cu14 | 3.033     |
| Cu2-S2   | 2.281     | Cu2-S3   | 2.281     |
| Cu2-S5   | 2.281     | Cu3-S1   | 2.275     |
| Cu3-S2   | 2.273     | Cu3-S6   | 2.273     |
| Cu5-S4   | 2.299     | Cu5-S5   | 2.258     |
| Cu5-S6   | 2.281     | Cu7-S1   | 2.302     |
| Cu7-S3   | 2.285     | Cu7-S4   | 2.275     |
| Cu9-S8   | 2.281     | Cu9-S9   | 2.281     |
| Cu9-S11  | 2.281     | Cu10-S7  | 2.275     |
| Cu10-S8  | 2.273     | Cu10-S12 | 2.273     |
| Cu12-S10 | 2.299     | Cu12-S11 | 2.258     |
| Cu12-S12 | 2.281     | Cu14-S7  | 2.302     |
| Cu14-S9  | 2.285     | Cu14-S10 | 2.275     |
| S2-Cu1   | 2.247     | S4-Cu1   | 2.240     |
| S1-Cu4   | 2.267     | S5-Cu4   | 2.246     |
| S3-Cu6   | 2.247     | S6-Cu6   | 2.247     |
| S8-Cu8   | 2.247     | S10-Cu8  | 2.240     |
| S7-Cu11  | 2.267     | S11-Cu11 | 2.246     |
| S9-Cu13  | 2.247     | S12-Cu13 | 2.247     |

**Table S6.** Photophysical data of three AuCu<sub>14</sub> nanoclusters in CH<sub>2</sub>Cl<sub>2</sub> under ambient conditions.°

| Solution phase                               | AuCu <sub>14</sub> -C(CH <sub>3</sub> ) <sub>3</sub> | Solution phase                                  | AuCu <sub>14</sub> -CH(CH <sub>3</sub> ) <sub>2</sub> | AuCu <sub>14</sub> -CH <sub>3</sub> |
|----------------------------------------------|------------------------------------------------------|-------------------------------------------------|-------------------------------------------------------|-------------------------------------|
| $\Phi_{\text{PL}}(\%)$                       | 4.13                                                 | $\Phi_{\text{PL}}(\%)$                          | 5.37                                                  | 5.76                                |
| $\text{PL } \tau_{\text{ave}} (\mu\text{s})$ | 3.3                                                  | $\text{PL I } \tau_{\text{ave}} (\text{ns})$    | 175.2                                                 | 109.9                               |
|                                              |                                                      | $\text{PL II } \tau_{\text{ave}} (\mu\text{s})$ | 3.0                                                   | 2.5                                 |
| $\text{PL } k_{\text{r}} (\text{s}^{-1})$    | $1.4 \times 10^4$                                    | $\text{PL I } k_{\text{r}} (\text{s}^{-1})$     | $2.1 \times 10^5$                                     | $4.2 \times 10^5$                   |
|                                              |                                                      | $\text{PL I } k_{\text{nr}} (\text{s}^{-1})$    | $5.5 \times 10^6$                                     | $8.7 \times 10^6$                   |
| $\text{PL } k_{\text{nr}} (\text{s}^{-1})$   | $2.9 \times 10^5$                                    | $\text{PL II } k_{\text{r}} (\text{s}^{-1})$    | $5.4 \times 10^3$                                     | $4.4 \times 10^3$                   |
|                                              |                                                      | $\text{PL II } k_{\text{nr}} (\text{s}^{-1})$   | $3.3 \times 10^5$                                     | $4.0 \times 10^5$                   |

## Reference

- [1] T. N. Hooper, C. P. Butts, M. Green, M. F. Haddow, J. E. McGrady, C. A. Russell, *Chem. Eur. J.* **2009**, 15, 12196-12200.
- [2] K. J. Kilpin, R. Horvath, G. B. Jameson, S. G. Telfer, K. C. Gordon, J. D. Crowley, *Organometallics* **2010**, 29, 6186-6195.
- [3] P. Gao, J. Du, W. J. Hong, M. Z. Wu, Y. Feng, Y. J. Ding and M. Z. Zhu, *Small Struct.* **2024**, 6, 2400397.
- [4] O.V. Dolomanov, L.J. Bourhis, R.J Gildea, J.A.K. Howard, H. Puschmann, *J. Appl. Cryst.* **2009**, 42, 339-341.
- [5] G.M. Sheldrick, *Acta Cryst.* **2015**, A71, 3-8.
- [6] G. M. Sheldrick, *Acta Cryst.* **2008**, A64, 112-122.
